# Supplementary material for: AXL Targeting Abrogates Autophagic Flux and Induces Immunogenic Cell Death in Drug-Resistant Cancer Cells
Source: PubMed Central journal article supplement — J Thorac Oncol. Author manuscript; Available in PMC 2020 Aug 3. (PMC7397559; doi:10.1016/j.jtho.2020.01.015), 2020-02-01
Supplement: NIHMS1609069-supplement-Supplemental_material.pdf [file NIHMS1609069-supplement-Supplemental_material.pdf]

## SUPPLEMENTARY INFORMATION

### **AXL targeting abrogates autophagic flux and induces immunogenic cell death in drug resistant cancer cells**

Lotsberg ML, Wnuk-Lipinska K, Terry S, Tan TZ, Lu N, Trachsel-Moncho L, Røsland GV, Siraji MI, Hellesøy M, Rayford A, Jacobsen K, Ditzel HJ, Vintermyr OK, Bivona TG, Minna J, Brekken RA, Baguley B, Micklem D, Akslen LA, Gausdal G, Simonsen A, Thiery JP, Chouaib S, Lorens JB, Engelsens AST,

AXL targeting abrogates autophagic flux and induces immunogenic cell death in drug resistant cancer cells, *Journal of Thoracic Oncology* (2020),

doi: <https://doi.org/10.1016/j.jtho.2020.01.015>.

**Table S1**

**A**

| Gene     | Fold change (EB/E) | P value   |
|----------|--------------------|-----------|
| KLHL24   | -2,7101            | 3,953E-05 |
| EFNA1    | -2,5355            | 3,362E-05 |
| PDK4     | -2,4983            | 1,406E-06 |
| TXNIP    | -2,3464            | 9,240E-06 |
| HBP1     | -2,2778            | 5,839E-08 |
| PIK3IP1  | -2,2154            | 9,389E-06 |
| FBXO32   | -2,1058            | 7,170E-04 |
| KCNJ13   | -1,9786            | 3,360E-04 |
| BMF      | -1,9636            | 8,424E-04 |
| SNORD3A  | -1,8966            | 1,138E-04 |
| TMEM140  | -1,8426            | 2,078E-03 |
| CDKN1B   | -1,8386            | 4,284E-05 |
| SNORD3C  | -1,8171            | 5,656E-04 |
| SNORD3D  | -1,8129            | 2,385E-04 |
| ELF3     | -1,7845            | 4,775E-05 |
| LFNG     | -1,7660            | 2,774E-05 |
| FRAT2    | -1,7344            | 1,088E-06 |
| HIST2H4A | -1,6569            | 7,939E-05 |
| C10orf10 | -1,6421            | 3,064E-03 |
| BRD8     | -1,6354            | 1,269E-04 |
| GRB7     | -1,6317            | 6,708E-04 |
| PRR15L   | -1,6056            | 6,645E-04 |
| GBP2     | -1,6026            | 1,438E-04 |
| CCDC28A  | -1,5606            | 4,973E-04 |
| GCNT1    | -1,5570            | 5,532E-03 |
| C5orf41  | -1,5358            | 8,829E-06 |
| TAGLN    | -1,5329            | 8,487E-03 |
| C13orf15 | -1,5274            | 2,328E-03 |
| PMM1     | -1,5154            | 3,137E-03 |
| C17orf44 | -1,5073            | 4,680E-04 |

| Gene   | Fold change (EB/E) | P value   |
|--------|--------------------|-----------|
| KCTD6  | 1,5038             | 1,750E-05 |
| TUBA4A | 1,5238             | 6,178E-04 |
| CHSY1  | 1,5242             | 1,077E-04 |
| CCRN4L | 1,5268             | 7,306E-04 |
| NXT1   | 1,5312             | 1,997E-04 |
| PTGS2  | 1,5348             | 1,956E-03 |
| CTGF   | 1,5769             | 7,102E-05 |
| FOXC1  | 1,5901             | 5,908E-04 |
| IL1B   | 1,5906             | 2,474E-04 |
| TRPC6  | 1,5969             | 6,013E-03 |
| TP63   | 1,5974             | 3,733E-04 |
| URB2   | 1,6088             | 9,090E-06 |

| Gene      | Fold change (EB/E) | P value   |
|-----------|--------------------|-----------|
| PAG1      | 1,6103             | 1,668E-03 |
| TNFRSF10A | 1,6184             | 3,697E-04 |
| ADORA2B   | 1,6294             | 3,341E-04 |
| KRT16     | 1,6304             | 1,735E-03 |
| AMD1      | 1,6347             | 2,305E-04 |
| TBX15     | 1,6444             | 6,591E-04 |
| CYR61     | 1,6526             | 7,775E-03 |
| ARL4C     | 1,6575             | 7,909E-06 |
| TRIB1     | 1,6627             | 9,010E-05 |
| EDN2      | 1,6630             | 2,085E-06 |
| AXUD1     | 1,6823             | 4,445E-03 |
| PPRC1     | 1,7227             | 1,748E-04 |
| SPRED1    | 1,7269             | 5,818E-05 |
| CSF2      | 1,7350             | 3,905E-03 |
| HES1      | 1,7472             | 1,527E-04 |
| CX3CL1    | 1,8021             | 2,309E-03 |
| SLC20A1   | 1,8139             | 1,658E-05 |
| ID1       | 1,8252             | 8,288E-05 |
| PTHLH     | 1,8628             | 2,235E-03 |
| MARS2     | 1,8871             | 7,683E-06 |
| SPRY1     | 1,9047             | 5,154E-06 |
| MYC       | 1,9115             | 2,690E-04 |
| ISG20L1   | 1,9713             | 2,218E-04 |
| FOSL1     | 1,9747             | 1,906E-05 |
| LOC729252 | 1,9796             | 9,626E-05 |
| HBEGF     | 2,0086             | 1,762E-03 |
| SPRY2     | 2,0291             | 6,845E-06 |
| FGFBP1    | 2,0312             | 6,696E-04 |
| EPHA2     | 2,1752             | 1,718E-05 |
| LOC730525 | 2,1834             | 2,605E-05 |
| C8orf4    | 2,2129             | 1,130E-03 |
| ANGPTL4   | 2,2148             | 1,882E-03 |
| FAM46C    | 2,2319             | 6,557E-03 |
| DUSP5     | 2,3142             | 6,464E-07 |
| SPRY4     | 2,3600             | 8,543E-06 |
| HAS3      | 2,3973             | 7,051E-04 |
| HSPA1A    | 2,3979             | 2,966E-04 |
| ERRF1     | 2,4286             | 1,043E-04 |
| PHLDA1    | 2,5452             | 5,304E-05 |
| FOXQ1     | 2,6982             | 3,320E-05 |
| BHLHB2    | 2,7663             | 1,649E-04 |
| EGR1      | 2,8068             | 3,171E-05 |
| MGC102966 | 3,0360             | 9,450E-05 |
| LOC400578 | 3,1101             | 1,026E-04 |
| IER3      | 3,2548             | 5,301E-05 |
| DUSP6     | 5,5468             | 8,772E-08 |

**B**

| Gene ontology (GO) biological process complete                                   | Expected | Fold Enrich. | Significance (P) |
|----------------------------------------------------------------------------------|----------|--------------|------------------|
| neutrophil chemotaxis                                                            | .28      | 21.71        | 3.49E-03         |
| negative regulation of MAP kinase activity                                       | .32      | 21.56        | 3.81E-04         |
| response to gamma radiation                                                      | .24      | 21.11        | 3.83E-02         |
| regulation of ERK1 and ERK2 cascade                                              | 1.13     | 9.72         | 1.74E-04         |
| regulation of angiogenesis                                                       | .99      | 9.12         | 6.09E-03         |
| regulation of cysteine-type endopeptidase activity involved in apoptotic process | .89      | 8.98         | 2.89E-02         |
| aging                                                                            | 1.32     | 8.33         | 8.16E-04         |
| response to lipopolysaccharide                                                   | 1.43     | 7.67         | 1.85E-03         |
| positive regulation of response to external stimulus                             | 1.18     | 7.60         | 2.68E-02         |
| inflammatory response                                                            | 2.11     | 7.57         | 3.03E-06         |
| response to hypoxia                                                              | 1.40     | 7.17         | 1.24E-02         |
| cellular response to growth factor stimulus                                      | 2.07     | 6.76         | 1.72E-04         |
| regulation of sequence-specific DNA binding transcription factor activity        | 1.65     | 6.67         | 7.22E-03         |
| blood vessel morphogenesis                                                       | 1.67     | 6.58         | 8.20E-03         |
| morphogenesis of an epithelium                                                   | 1.84     | 6.51         | 2.84E-03         |
| MAPK cascade                                                                     | 1.63     | 6.14         | 4.79E-02         |
| positive regulation of cell migration                                            | 1.80     | 6.12         | 1.66E-02         |
| reproductive structure development                                               | 1.86     | 5.91         | 2.28E-02         |
| positive regulation of apoptotic process                                         | 2.59     | 5.80         | 3.83E-04         |

**Table S2****A**

| Target                                            | Product Number | Supplier             | Dilution<br>(Application)  | Host Species  |
|---------------------------------------------------|----------------|----------------------|----------------------------|---------------|
| <b>Apoptosis cocktail: actin, caspase 3, PARP</b> | ab136812       | Abcam                | 1:250 (WB)                 | Rabbit/ Mouse |
| <b>AXL</b>                                        | 1H12-1B7-5D6   | BerGenBio            | 1:1000 (WB)                | Mouse         |
| <b>AXL</b>                                        | MAB154         | R&D Systems          | 1:100 (Flow)               | Mouse         |
| <b>Beclin-1</b>                                   | 3495           | Cell Signaling Tech. | 1:1000 (WB)                | Rabbit        |
| <b>Beta-actin</b>                                 | ab8227         | Abcam                | 1:1000 (WB)                | Rabbit        |
| <b>Calreticulin</b>                               | ab83220        | Abcam                | 1:100 (Flow)               | Rabbit        |
| <b>Cleaved caspase 3</b>                          | 9661           | Cell Signaling Tech. | 1:500 (WB)                 | Rabbit        |
| <b>Cleaved caspase 8</b>                          | 9496           | Cell Signaling Tech. | 1:1000 (WB)                | Rabbit        |
| <b>E-cadherin</b>                                 | 14472S         | Cell Signaling Tech. | 1:1000 (WB)<br>1:100 (ICC) | Mouse         |
| <b>GAPDH</b>                                      | ab128915       | Abcam                | 1:50,000 (WB)              | Rabbit        |
| <b>LC3A/B (D3U4C)</b>                             | 12741          | Cell Signaling Tech. | 1:1000 (WB)<br>1:100 (ICC) | Rabbit        |
| <b>N-cadherin</b>                                 | ab18203        | Abcam                | 1:500 (WB)                 | Rabbit        |
| <b>pAkt (Ser473)</b>                              | 9271           | Cell Signaling Tech. | 1:1000 (WB)                | Rabbit        |
| <b>pAXL (Tyr779)</b>                              | AF2228         | R&D Systems          | 1 µg/ml (WB)               | Rabbit        |
| <b>SQSTM1/p62</b>                                 | ab56416        | Abcam                | 1:1000 (WB)                | Mouse         |
| <b>Vimentin</b>                                   | ab92547        | Abcam                | 1:5000 (WB)<br>1:100 (ICC) | Rabbit        |

**B**

| Antibody target          | Clone                    | Metal tag | Conc./Dilution | Product number /<br>Supplier |
|--------------------------|--------------------------|-----------|----------------|------------------------------|
| <b>Cleaved caspase 3</b> | 5A1E (cleaved at Asp175) | 142 Nd    | 1 µg/ml        | 9661, CST                    |
| <b>pStat3</b>            | 4 (pY705)                | 145 Nd    | 4 µg/ml        | 612356, BD                   |
| <b>pStat5</b>            | 47 (pY694)               | 146 Nd    | 2 µg/ml        | 61964, BD                    |
| <b>PD-L1</b>             | 29E.2A3                  | 148 Nd    | 1:50           | 3148017B, Fluidigm           |
| <b>pEGFR</b>             | Y38 (pTyr1068)           | 149 Sm    | 0.5 µg/ml      | ab5644, Abcam                |
| <b>pRb</b>               | J112-906 (pSer807/811)   | 150 Nd    | 1:200          | 201313, Fluidigm             |
| <b>pAkt</b>              | D9E (pS473)              | 152 Sm    | 1:50           | 3152005A, Fluidigm           |
| <b>pStat1</b>            | 4a (pY701)               | 153 Eu    | 1:50           | 3153005A, Fluidigm           |
| <b>Vimentin</b>          | D21H3                    | 154 Sm    | 4 µg/ml        | 5741, CST                    |
| <b>p38</b>               | D3F9                     | 156 Gd    | 1:50           | 3156002A, Fluidigm           |
| <b>E-cadherin</b>        | 24E11                    | 158 Gd    | 1:200          | 3158021A, Fluidigm           |
| <b>pMAPKAPK2</b>         | 27B7                     | 159 Tb    | 1:50           | 3158021A, Fluidigm           |
| <b>pErk1/2</b>           | 20A (pT202/pY204)        | 161 Gd    | 1 µg/ml        | 612358, BD                   |
| <b>pPLCg2</b>            | K86-689.37 (pY759)       | 162 Dy    | 2 µg/ml        | 558490, BD                   |
| <b>TGFβ</b>              | TW46H10                  | 163 Dy    | 1:200          | 3163010B, Fluidigm           |
| <b>pNFκB</b>             | K10-895.12.50 (pS529)    | 166 Er    | 0.5 µg/ml      | 558393, BD                   |
| <b>YAP</b>               | H9 (C-terminal 379-407)  | 167 Er    | 1 µg/ml        | sc-271134, Santa Cruz        |
| <b>Axl</b>               | 1H12 (total)             | 168 Er    | 2 µg/ml        | BerGenBio                    |
| <b>EGFR</b>              | AY13                     | 170 Er    | 1:400          | 3170009B, Fluidigm           |
| <b>pS6</b>               | N7-548 (pS235/S236)      | 172 Yb    | 1:200          | 3172008A, Fluidigm           |
| <b>pHistone H3</b>       | HTA28 (pSer28)           | 175 Lu    | 1:200          | 201313, Fluidigm             |
| <b>CD44</b>              | IM7 (total, surface)     | 176 Yb    | 0.125 µg/ml    | 553131, BD                   |

Figure S1

DAPI

E-cadherin

Vimentin

MERGE

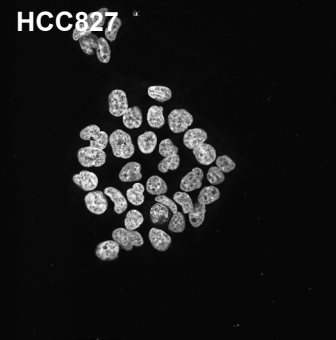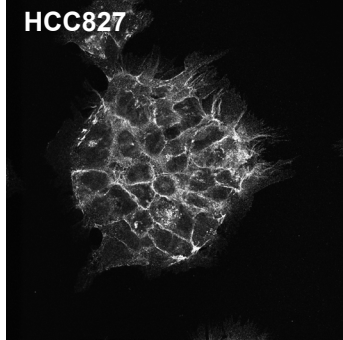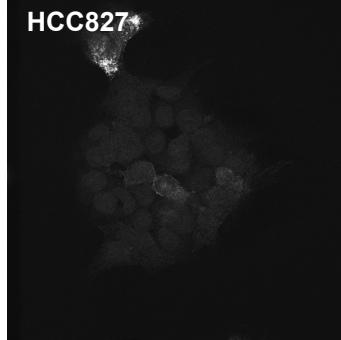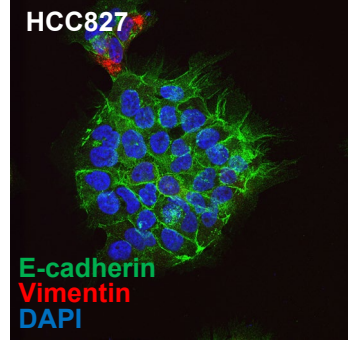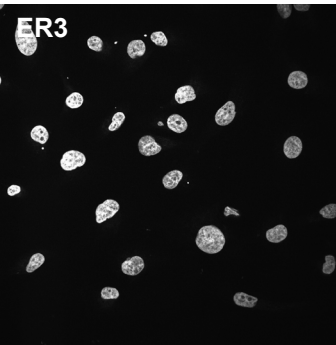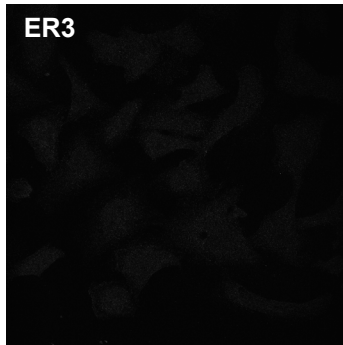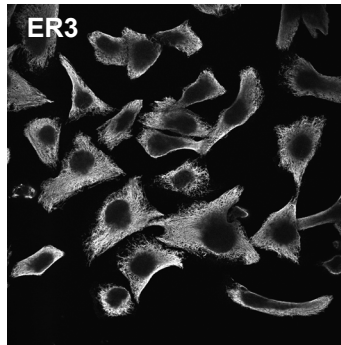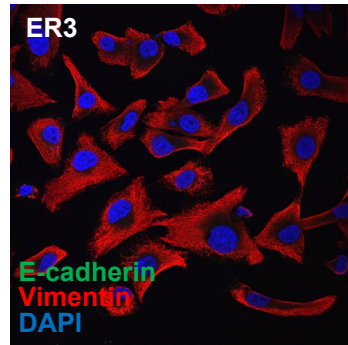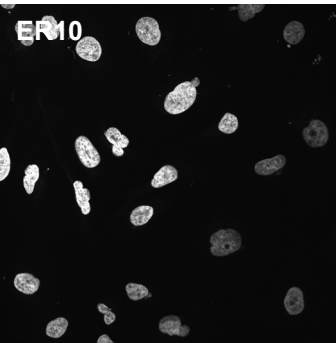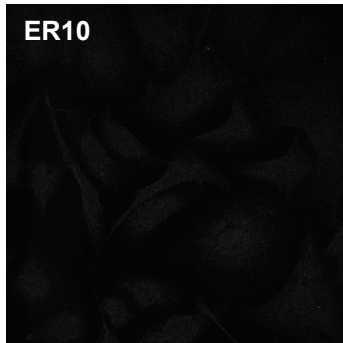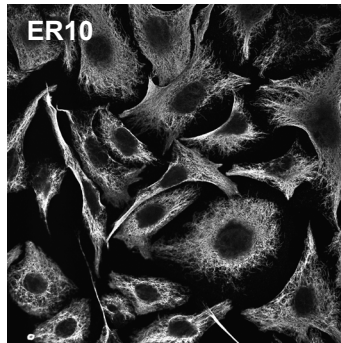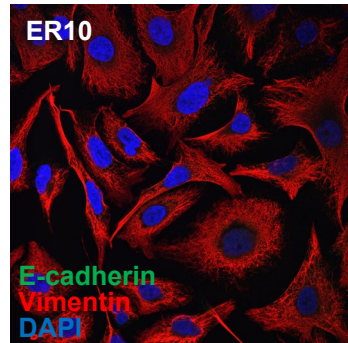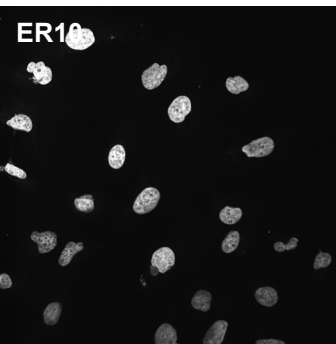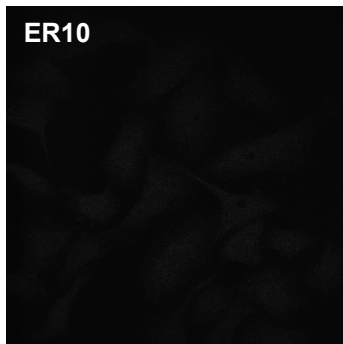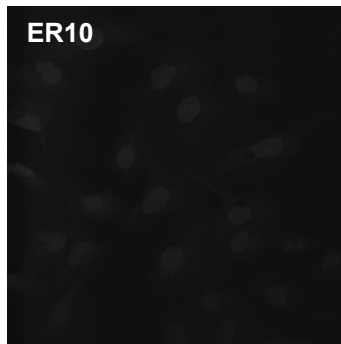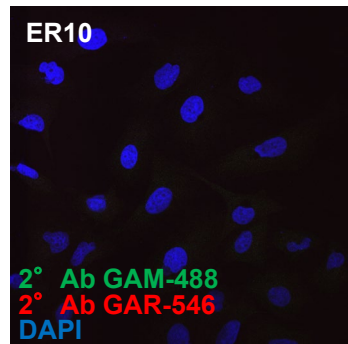

**Figure S2**

**A**

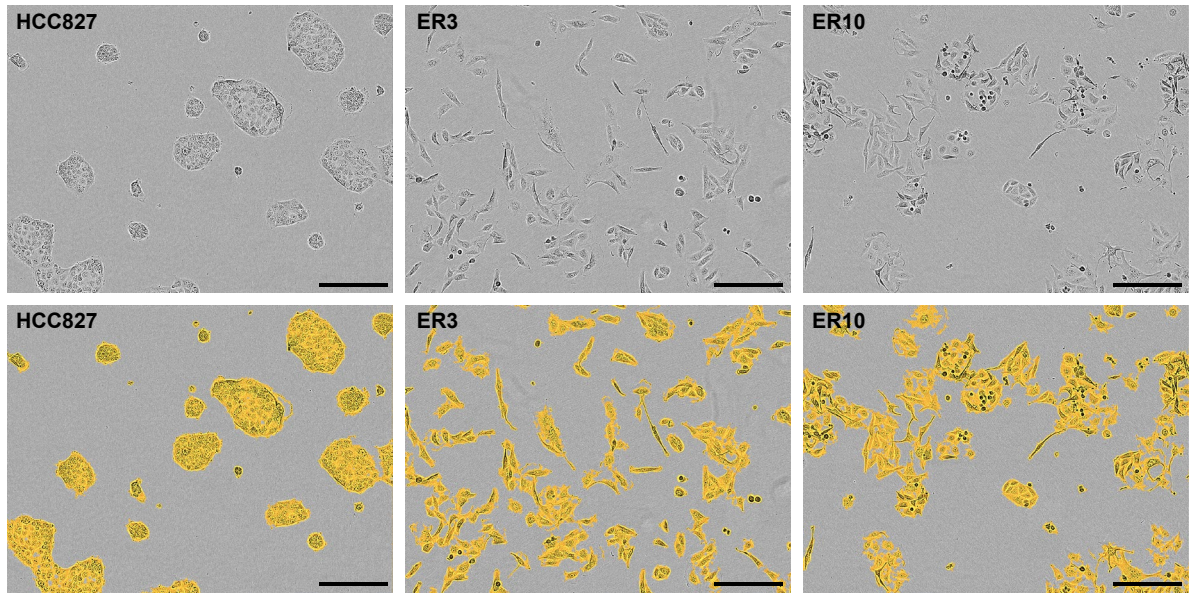

**B**

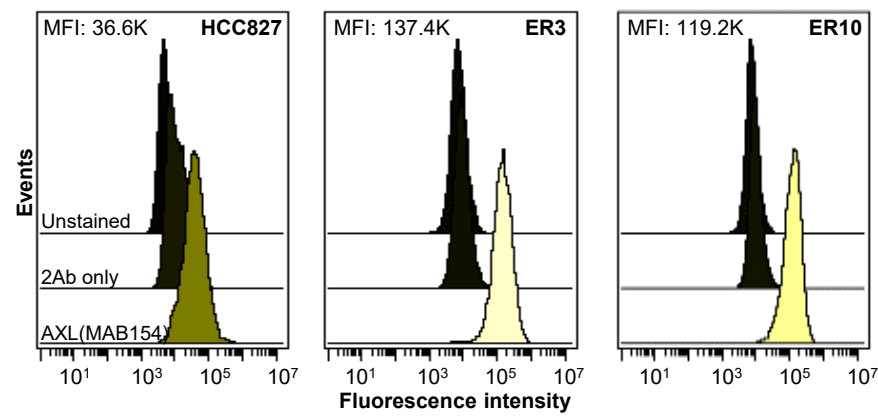

**C**

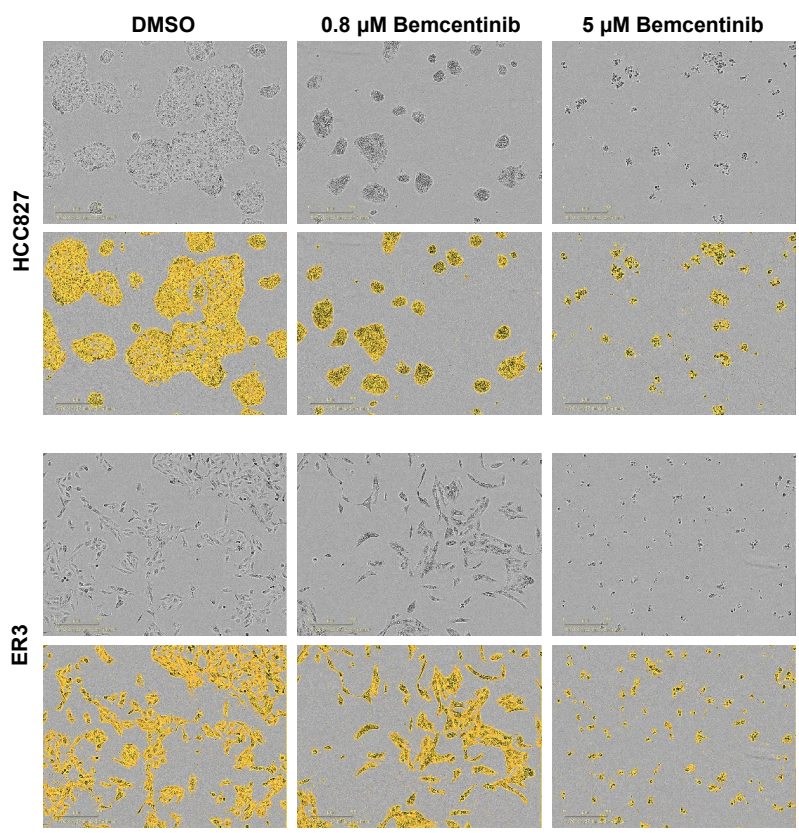

**Figure S3**

**A**

**Cell viability**

| HCC827    | 10uM Erl | 1uM Erl | 100nM Erl | 10nM Erl | 1nM Erl | 0.1nM Erl | 0.01nM Erl | 0.001nM Erl | 0.0001nM Erl | 0nM Erl |
|-----------|----------|---------|-----------|----------|---------|-----------|------------|-------------|--------------|---------|
| 5µM Bem   | 0,002    | 0,002   | 0,003     | 0,003    | 0,002   | 0,002     | 0,002      | 0,002       | 0,002        | 0,003   |
| 2µM Bem   | 0,013    | 0,032   | 0,037     | 0,039    | 0,047   | 0,047     | 0,045      | 0,059       | 0,051        | 0,056   |
| 1µM Bem   | 0,020    | 0,048   | 0,052     | 0,070    | 0,120   | 0,138     | 0,137      | 0,176       | 0,147        | 0,162   |
| 0.8µM Bem | 0,021    | 0,051   | 0,048     | 0,072    | 0,195   | 0,270     | 0,339      | 0,358       | 0,324        | 0,360   |
| 0.5µM Bem | 0,028    | 0,050   | 0,046     | 0,079    | 0,465   | 0,522     | 0,528      | 0,611       | 0,659        | 0,794   |
| 0µM Bem   | 0,024    | 0,044   | 0,050     | 0,168    | 0,712   | 0,810     | 0,720      | 0,794       | 0,854        | 1,000   |

  

| HCC827ER3 | 10uM Erl | 1uM Erl | 100nM Erl | 10nM Erl | 1nM Erl | 0.1nM Erl | 0.01nM Erl | 0.001nM Erl | 0.0001nM Erl | 0nM Erl |
|-----------|----------|---------|-----------|----------|---------|-----------|------------|-------------|--------------|---------|
| 5µM Bem   | 0,007    | 0,021   | 0,008     | 0,008    | 0,011   | 0,020     | 0,005      | 0,016       | 0,012        | 0,011   |
| 2µM Bem   | 0,210    | 0,373   | 0,356     | 0,365    | 0,220   | 0,213     | 0,311      | 0,148       | 0,315        | 0,266   |
| 1µM Bem   | 0,442    | 0,667   | 0,609     | 0,544    | 0,575   | 0,554     | 0,587      | 0,410       | 0,541        | 0,626   |
| 0.8µM Bem | 0,524    | 0,763   | 0,758     | 0,675    | 0,663   | 0,605     | 0,747      | 0,467       | 0,649        | 0,752   |
| 0.5µM Bem | 0,593    | 0,976   | 0,877     | 0,831    | 0,782   | 0,783     | 0,906      | 0,545       | 0,792        | 0,863   |
| 0µM Bem   | 0,728    | 1,169   | 1,129     | 1,080    | 0,953   | 1,029     | 1,200      | 0,738       | 1,038        | 1,000   |

  

| HCC827ER10 | 10uM Erl | 1uM Erl | 100nM Erl | 10nM Erl | 1nM Erl | 0.1nM Erl | 0.01nM Erl | 0.001nM Erl | 0.0001nM Erl | 0nM Erl |
|------------|----------|---------|-----------|----------|---------|-----------|------------|-------------|--------------|---------|
| 5µM Bem    | 0,003    | 0,004   | 0,004     | 0,004    | 0,004   | 0,004     | 0,004      | 0,004       | 0,004        | 0,004   |
| 2µM Bem    | 0,063    | 0,160   | 0,205     | 0,198    | 0,239   | 0,205     | 0,187      | 0,211       | 0,226        | 0,152   |
| 1µM Bem    | 0,375    | 0,714   | 0,648     | 0,682    | 0,679   | 0,526     | 0,503      | 0,648       | 0,661        | 0,613   |
| 0.8µM Bem  | 0,616    | 0,866   | 0,889     | 0,831    | 0,945   | 0,793     | 0,665      | 0,729       | 0,923        | 0,779   |
| 0.5µM Bem  | 1,081    | 1,208   | 1,219     | 1,134    | 1,095   | 1,118     | 1,125      | 1,180       | 1,061        | 0,916   |
| 0µM Bem    | 1,170    | 1,236   | 1,246     | 1,242    | 1,375   | 1,166     | 1,036      | 1,131       | 1,129        | 1,000   |

**B**

**Delta Bliss**

| HCC827    | 10µM Erl | 1µM Erl | 100nM Erl | 10nM Erl | 1nM Erl | 0.1nM Erl | 0.01nM Erl | 0.001nM Erl | 0.0001nM Erl |
|-----------|----------|---------|-----------|----------|---------|-----------|------------|-------------|--------------|
| 5µM Bem   | 0,002    | 0,002   | 0,002     | 0,002    | 0,001   | 0,000     | 0,000      | 0,000       | 0,010        |
| 2µM Bem   | 0,012    | 0,030   | 0,034     | 0,030    | 0,008   | 0,002     | 0,004      | 0,014       | 0,137        |
| 1µM Bem   | 0,016    | 0,041   | 0,044     | 0,042    | 0,005   | 0,007     | 0,020      | 0,047       | 0,231        |
| 0.8µM Bem | 0,012    | 0,035   | 0,030     | 0,012    | -0,062  | -0,022    | 0,079      | 0,072       | 0,173        |
| 0.5µM Bem | 0,009    | 0,015   | 0,006     | -0,055   | -0,100  | -0,121    | -0,044     | -0,020      | -0,329       |
|           | 0,051    | 0,123   | 0,116     | 0,031    | -0,149  | -0,134    | 0,060      | 0,114       | 0,223        |

  

| HCC827ER3 | 10µM Erl | 1µM Erl | 100nM Erl | 10nM Erl | 1nM Erl | 0.1nM Erl | 0.01nM Erl | 0.001nM Erl | 0.0001nM Erl |
|-----------|----------|---------|-----------|----------|---------|-----------|------------|-------------|--------------|
| 5µM Bem   | -0,001   | 0,011   | -0,003    | -0,004   | 0,001   | 0,009     | -0,005     | 0,008       | 0,001        |
| 2µM Bem   | 0,016    | 0,107   | 0,090     | 0,077    | -0,034  | -0,060    | 0,045      | -0,048      | 0,231        |
| 1µM Bem   | -0,013   | 0,041   | -0,017    | -0,132   | -0,021  | -0,090    | -0,039     | -0,052      | -0,432       |
| 0.8µM Bem | -0,024   | 0,010   | 0,006     | -0,325   | -0,053  | -0,170    | -0,005     | -0,088      | -0,782       |
| 0.5µM Bem | -0,035   | 0,113   | 0,013     | -0,169   | -0,041  | -0,105    | 0,043      | -0,092      | -0,480       |
|           | -0,011   | 0,056   | 0,018     | -0,110   | -0,030  | -0,083    | 0,008      | -0,055      | -0,289       |

  

| HCC827ER10 | 10µM Erl | 1µM Erl | 100nM Erl | 10nM Erl | 1nM Erl | 0.1nM Erl | 0.01nM Erl | 0.001nM Erl | 0.0001nM Erl |
|------------|----------|---------|-----------|----------|---------|-----------|------------|-------------|--------------|
| 5µM Bem    | -0,001   | -0,001  | 0,000     | 0,000    | 0,000   | 0,000     | 0,000      | 0,000       | 0,000        |
| 2µM Bem    | -0,090   | 0,008   | 0,053     | 0,046    | 0,087   | 0,053     | 0,029      | 0,059       | 0,074        |
| 1µM Bem    | -0,238   | 0,101   | 0,035     | 0,069    | 0,066   | -0,087    | -0,132     | 0,035       | 0,048        |
| 0.8µM Bem  | -0,163   | 0,087   | 0,111     | 0,053    | 0,166   | 0,014     | -0,142     | -0,050      | 0,144        |
| 0.5µM Bem  | 0,084    | 0,084   | 0,084     | 0,084    | 0,179   | 0,084     | 0,176      | 0,264       | 0,084        |
|            | -0,081   | 0,056   | 0,056     | 0,050    | 0,100   | 0,013     | -0,014     | 0,062       | 0,070        |

**C**

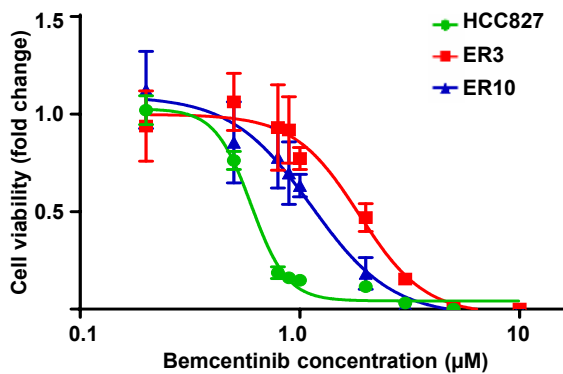

**D**

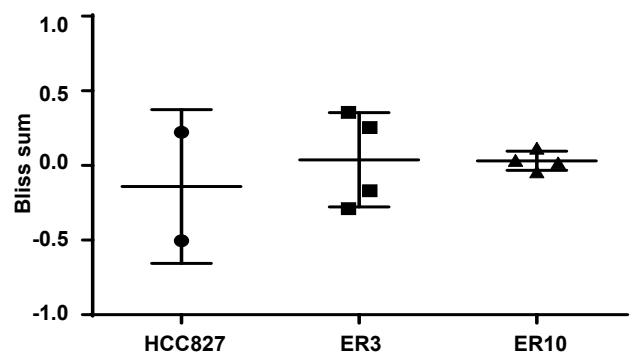

**E**

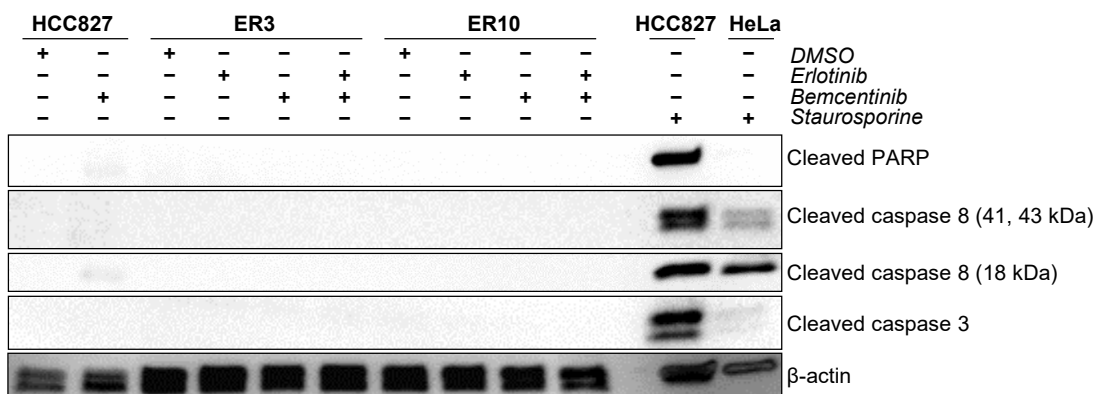

**Figure S4**

**A**

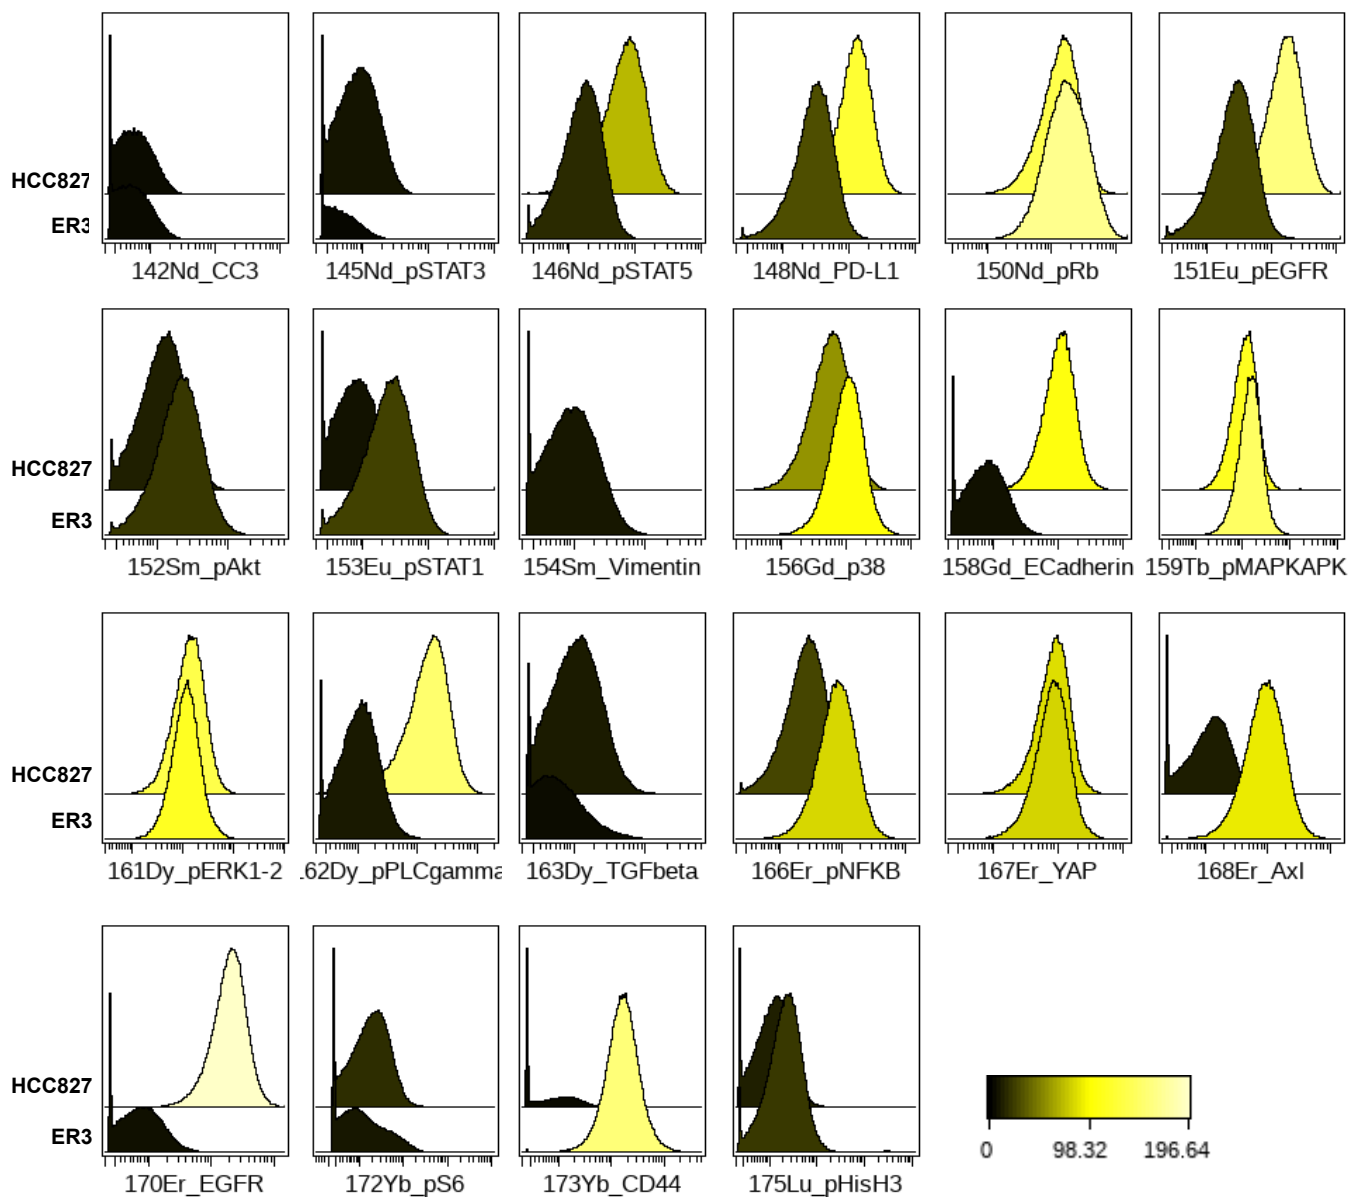

**B**

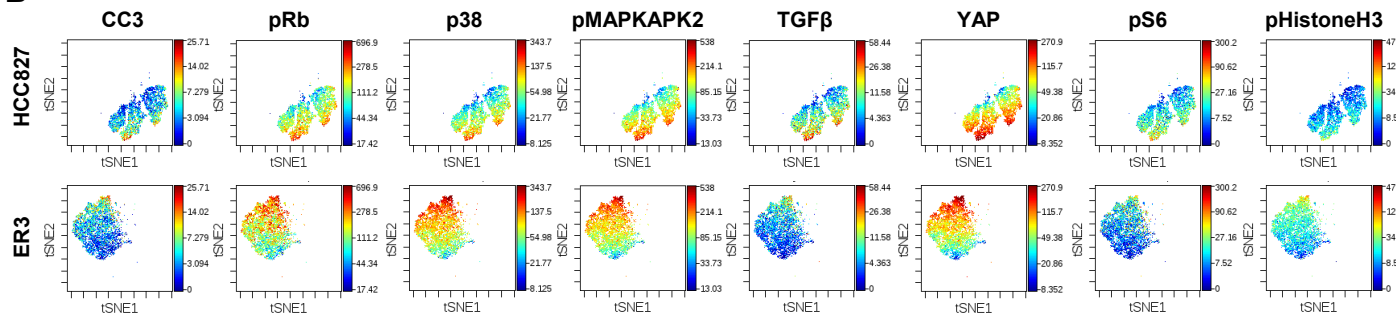

**C**

|        | 142Nd_CC3 | 145Nd_pSTAT3 | 146Nd_pSTAT5 | 148Nd_PD-L1 | 150Nd_pRb | 151Eu_pEGFR | 152Sm_pAkt | 153Eu_pSTAT1 | 154Sm_Vimentin | 156Gd_p38 | 158Gd_ECadherin | 159Tb_pMAPKAPK2 | 161Dy_pERK12 | 162Dy_pPLCGamma2 | 163Dy_TGFbeta | 166Er_pNFKB | 167Er_YAP | 168Er_Axl | 170Er_EGFR | 172Yb_pS6 | 173Yb_CD44 | 175Lu_pHisH3 |
|--------|-----------|--------------|--------------|-------------|-----------|-------------|------------|--------------|----------------|-----------|-----------------|-----------------|--------------|------------------|---------------|-------------|-----------|-----------|------------|-----------|------------|--------------|
| HCC827 | 4.53      | 7.95         | 71.24        | 123.79      | 136.08    | 160.7       | 12.29      | 7.23         | 0.0            | 56.82     | 105.54          | 113.92          | 135.17       | 151.98           | 10.51         | 26.96       | 85.89     | 11.31     | 196.64     | 17.7      | 3.97       | 12.0         |
| ER3    | 4.01      | 2.95         | 16.20        | 30.24       | 167.72    | 27.15       | 21.3       | 25.17        | 8.99           | 103.44    | 6.82            | 146.81          | 115.1        | 9.93             | 4.99          | 83.02       | 82.12     | 90.68     | 6.35       | 9.06      | 157.37     | 21.89        |

**Figure S5**

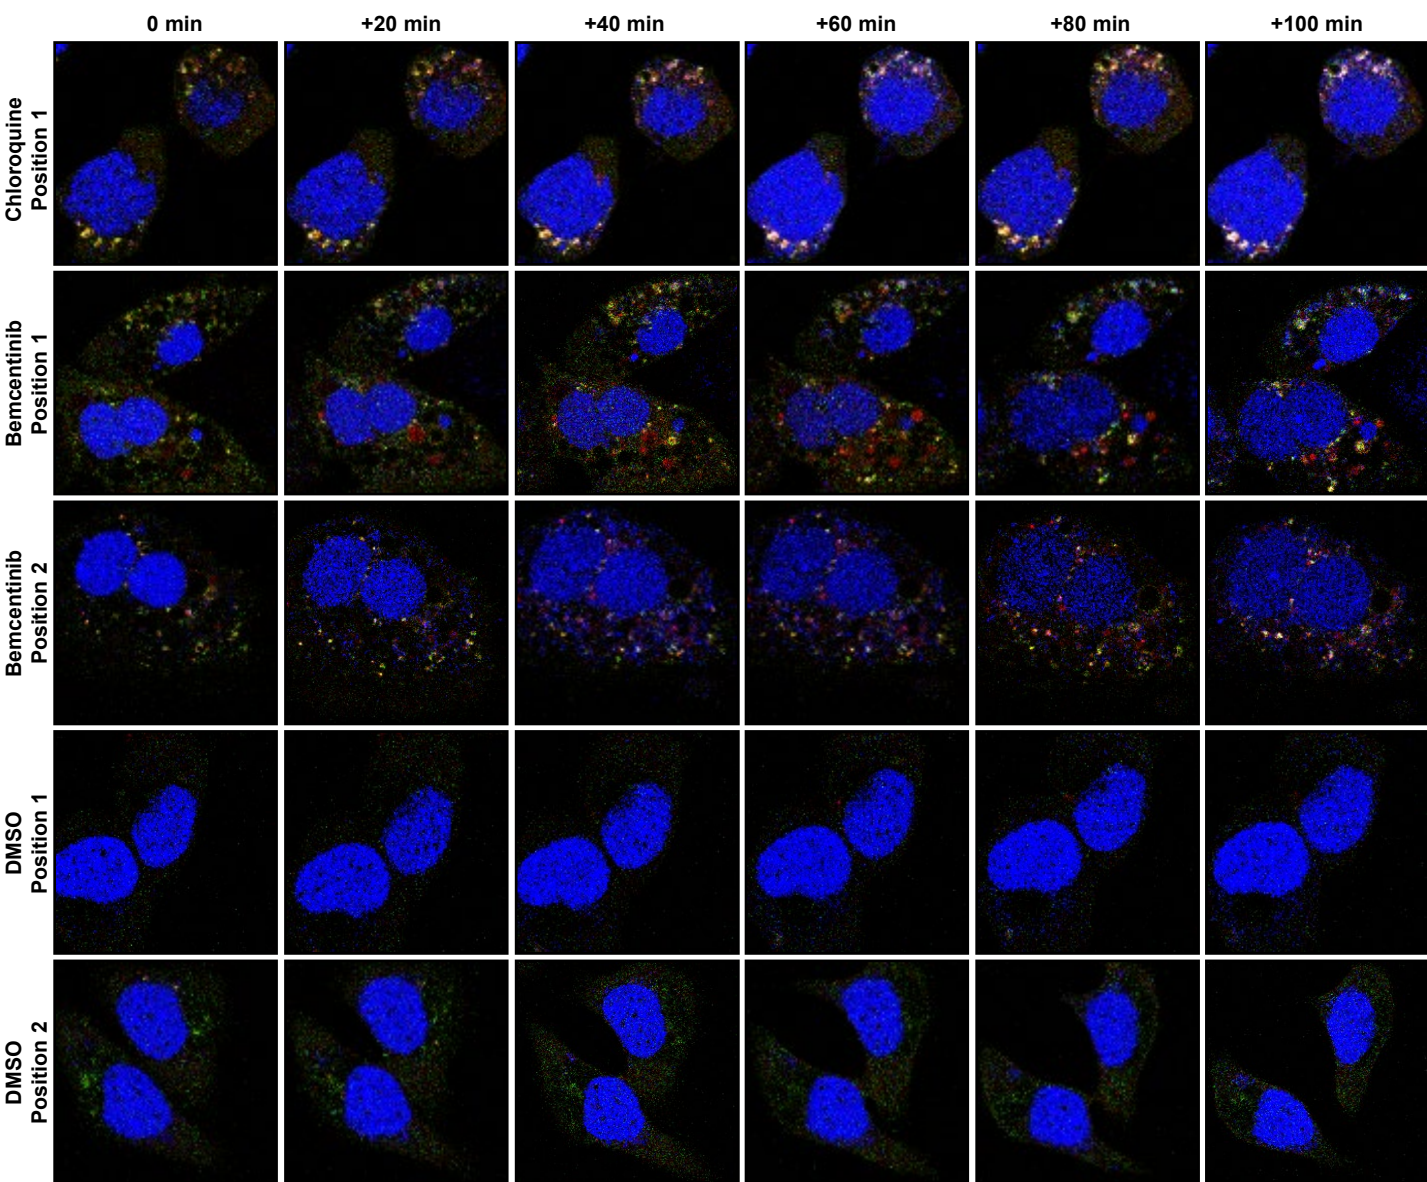



**Figure S6**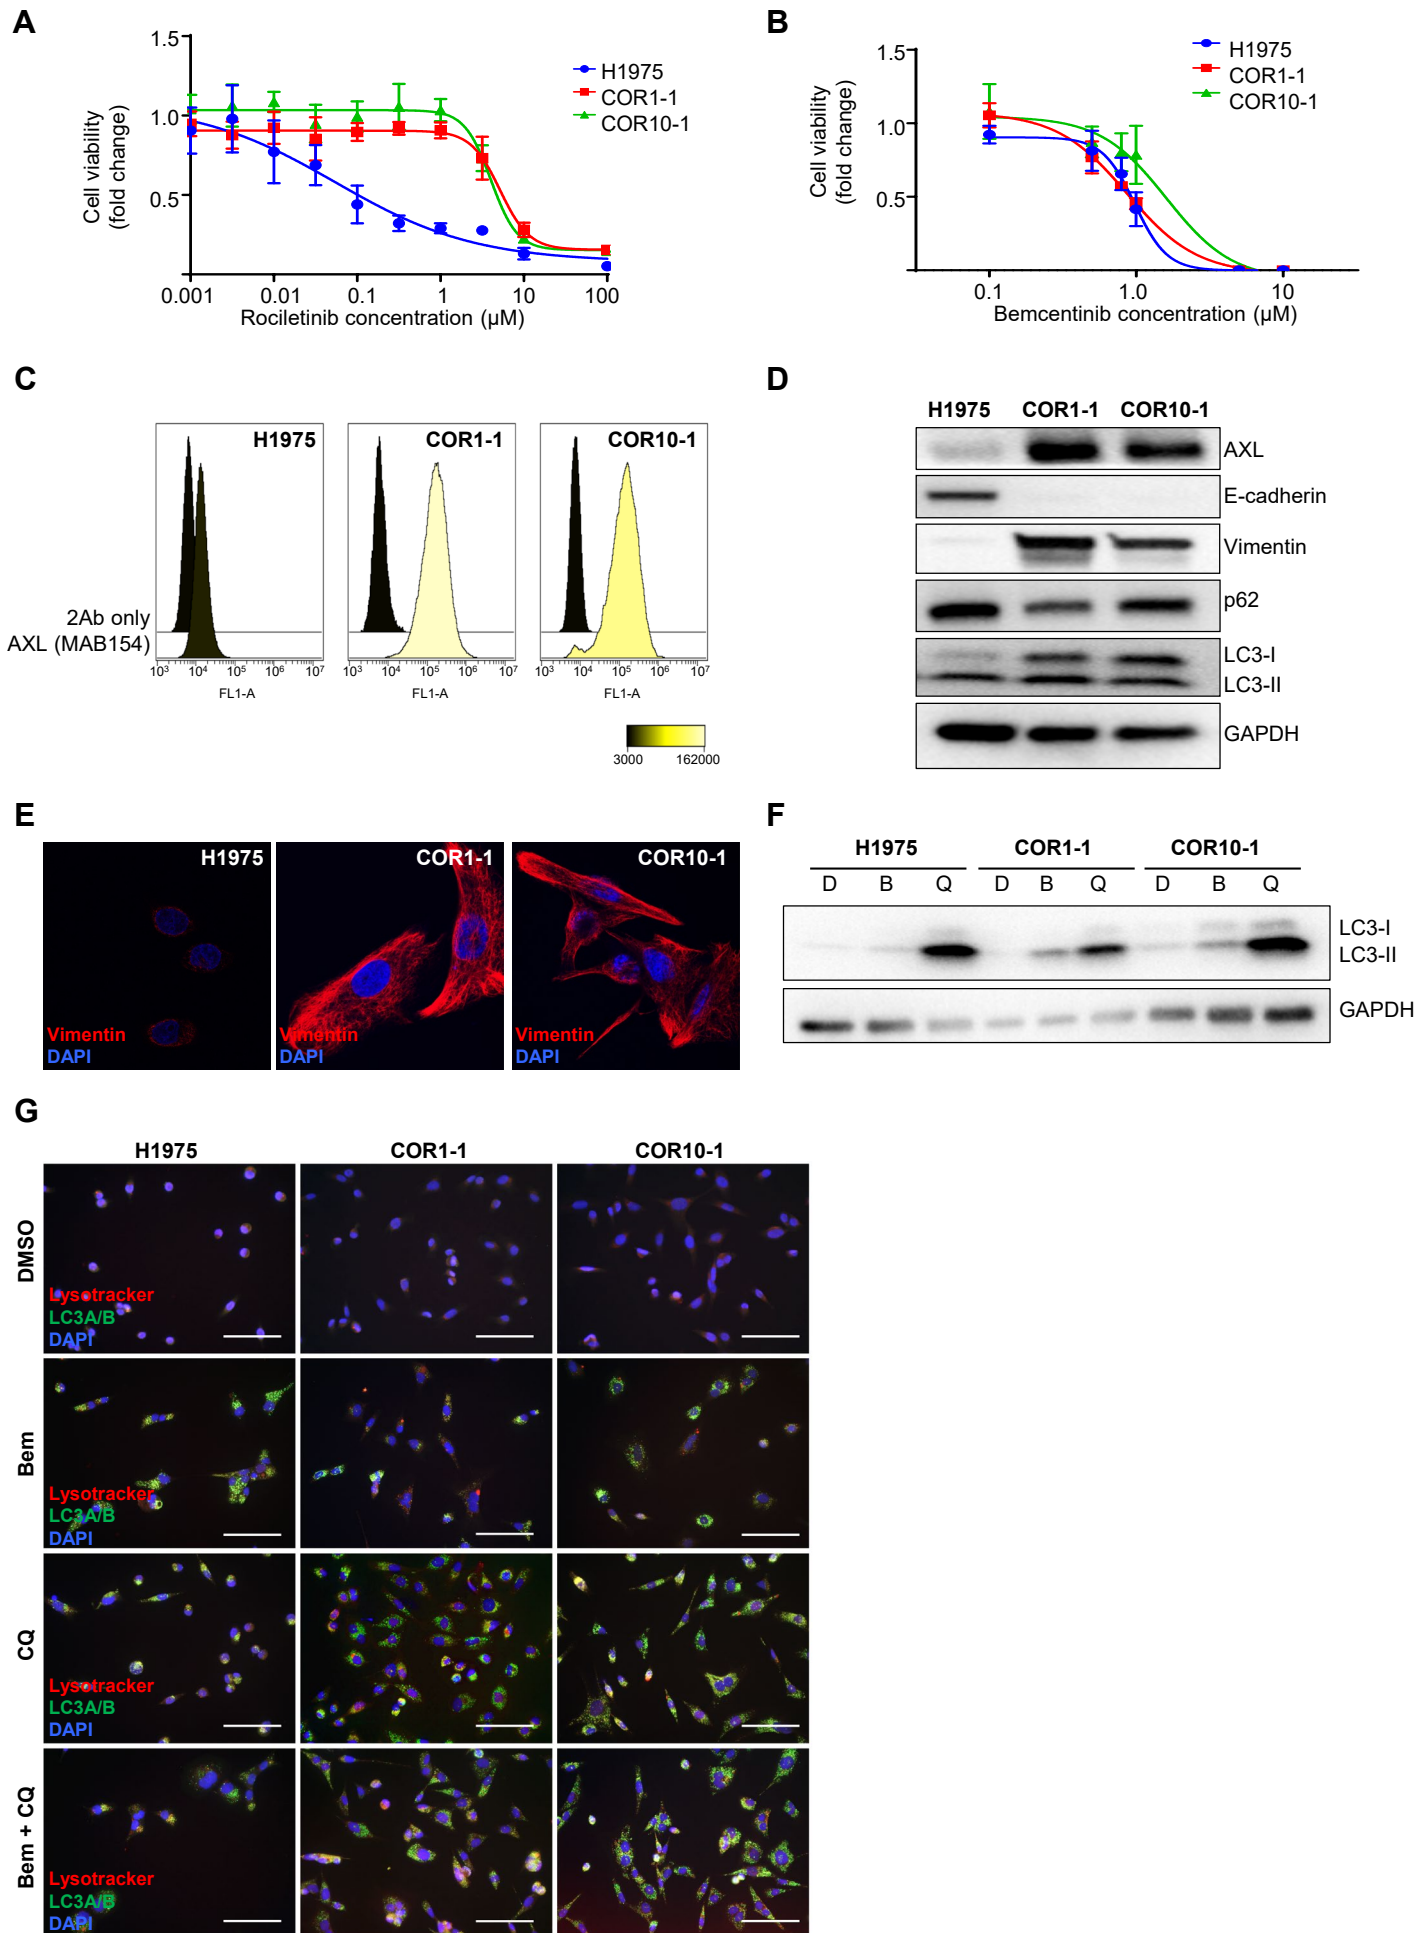

## SUPPLEMENTARY FIGURE LEGENDS

### Table S1. Genes differentially expressed between erlotinib/bemcentinib -treated and erlotinib-monotherapy treated HCC827 parental tumors

(A) Nude mice challenged with 8 million HCC827 cells were treated with 50 mg/kg of bemcentinib, *b.i.d.*, and 50 mg/kg of erlotinib, *q.d.* and euthanized after 25 days of treatment. Gene expression analysis of mRNA extracts was performed using the Illumina Human HT-12 v4 Expression BeadChip whole-genome expression array. Probe level and gene level data were imported into J-Express Pro and differentially expressed genes between erlotinib-bemcentinib combinational treatment and erlotinib monotherapy-treated tumors were identified by the significance analysis of microarray (SAM). Differentially expressed genes (cutoff: 1.5-fold change and  $p < 0.01$ ) are listed. (B) Gene ontology (GO) analysis of upregulated genes in erlotinib- and bemcentinib-treated versus erlotinib-treated tumors. The table displays fold enrichment and  $p$  values, sorted by fold enrichment with the most specific biological process in the hierarchy displayed. Fold enrichment is calculated as the number of genes found in the gene list above (cutoff: 1.5-fold change and  $p < 0.01$ ) with a certain GO term divided by the number of genes expected (based on the size of the list and number of genes in genome within the GO term). A Bonferroni correction for multiple testing was applied.

### Table S2. List of antibodies

(A) Summary of antibodies used for western blot, flow cytometry and ICC. (B) Antibody target, clone and phospho-epitope, metal tag, final concentration or dilution, as well as product-number and supplier are given for each antibody included in the mass cytometry time of flight (CyTOF) experiment.

### Figure S1. Immunofluorescence: single channel display and negative control

Single channel displays and secondary antibody only negative control for the images shown in Figure 2B. Scale bar: 50  $\mu\text{m}$ .

### Figure S2. IncuCyte Live Cell Imaging and AXL Flow Cytometry

(A) Brightfield images obtained by IncuCyte ZOOM system without (upper row) and with (lower row) cell mask generated by the IncuCyte ZOOM software reveal the morphology and growth pattern of the parental HCC827 cells, ER3, and ER10 clones. Scalebar: 300  $\mu\text{m}$  (B) Representative flow cytometry histograms of HCC827, ER3, and ER10 cells immunofluorescently stained for AXL ( $n = 3$  independent experiments). MFI = median fluorescence intensity. (C) Brightfield images obtained by IncuCyte ZOOM system without (upper row) and with (lower row) cell mask generated

by the IncuCyte ZOOM software reveal the cellular morphology and growth pattern of the parental HCC827 and ER3 cells following 48 h bemcentinib treatment as indicated.

**Figure S3. Drug response to erlotinib and the selective AXL inhibitor bemcentinib in erlotinib-sensitive versus erlotinib resistant cells**

(A) Heat map of cell viability followed by 5 days treatment with erlotinib ± bemcentinib at indicated concentrations used for delta Bliss analysis. Values ranging from 0 (red) to 1 (green) represent the mean of two independent experiments of  $n = 6$  replicates/sample. Normalization was performed against the vehicle (DMSO)-treated sample for each cell line. (B) Synergy between erlotinib and bemcentinib was evaluated by the delta Bliss independence model. (C) The sensitivity of HCC827, ER3, and ER10 cells to the selective small molecule AXL inhibitor bemcentinib was measured by resazurin assay following 5 days treatment, and the IC<sub>50</sub> values for HCC827 cells was  $0.664 \mu\text{M} \pm 0.065$ , and  $1.119 \mu\text{M} \pm 0.110$  for ER3, and  $1.198 \mu\text{M} \pm 0.115$  for ER10 (mean IC<sub>50</sub> value ± SEM, for  $n = 4-6$  independent experiments). (D) Delta Bliss values calculated from the  $n = 2-4$  independent experiments. (E) Western blots to evaluate the induction of apoptosis in HCC827, ER3, and ER10 cells treated with erlotinib ( $1 \mu\text{M}$ ) and bemcentinib ( $0.8 \mu\text{M}$ ) for 24 hours. HCC827 and HeLa cells treated with staurosporine ( $1 \mu\text{M}$ ) were included as positive controls. Western blots for cleaved PARP (89 kDa), cleaved caspase 8 (43, 41, and 18 kDa), cleaved caspase 3 (19, 17 kDa) are shown.  $\beta$ -actin (42 kDa) is shown as a loading control.

**Figure S4. Additional CyTOF results**

(A) Histogram representation of the intensities of the 22 markers in the CyTOF panel. HCC827 parental cells (upper histogram), ER3 (lower histogram). Number of ion-clouds representing single cells on the y-axis. (B) viSNE plots displaying additional markers from the CyTOF panel. (C) Table summarizing median intensity values for all channels.

**Figure S5. Live cell time lapse of the autophagic flux**

ER10 cells stably expressing mCherry-EGFP-LC3B protein were pretreated with chloroquine ( $50 \mu\text{M}$ ), bemcentinib ( $0.8 \mu\text{M}$ ) or vehicle control (DMSO), for 24 hours and imaged by Leica SP8 confocal microscopy every 10 minutes over a time course of 100 minutes. Images from 1-2 representative positions are shown for each condition. The counterstain was performed with the nuclear dye Draq5 (blue).

**Figure S6. Characterization of H1975 cells and rociletinib resistant clones**

(A) Sensitivity to rociletinib (CO-1686) in H1975, COR1-1 and COR10-1 cells measured by resazurin cell viability assay after 5 days treatment. (B) Sensitivity to bemcentinib in H1975 COR1-

1 and COR10-1 cells measured by resazurin cell viability assay after 5 days treatment. **(C)** Representative flow cytometry histograms of HCC827, ER3, and ER10 cells immunofluorescently stained for AXL by MAB154 antibody reveal single-cell level of AXL expression ( $n = 3$  independent experiments). Y-axis represents the number of cells, and color intensity represents the fluorescence intensity. **(D)** Western blot for H1975, COR1-1, COR10-1 cell lysates for immunodetection of AXL (144kDa), E-cadherin (CDH1, 135 kDa), vimentin (VIM, 54 kDa), p62 (SQSTM1, 62 kDa) and LC3A/B (LC3-I 17 kDa, LC3-II 19 kDa). GAPDH is shown as a loading control. **(E)** Representative confocal images of H1975, COR1-1 and COR10-1 cells immunofluorescently labelled for the mesenchymal intermediate filament vimentin (VIM, red); DAPI nuclear stain (blue). **(F)** Western blotting shows relative protein levels of LC3A/B (LC3-I 17 kDa, LC3-II 19 kDa) in lysates of H1975, COR 1-1, and COR10-1 cells treated for 24 hours by vehicle (DMSO; D), bemcentinib (0.8  $\mu\text{M}$ ; B) or chloroquine (50  $\mu\text{M}$ ; Q). GAPDH (37 kDa) is shown as a loading control. **(G)** Staining of the erlotinib resistant H1975 parental cells and the rocletinib resistant clones COR1-1 and COR10-1 by LysoTracker (red DN-99) in combination with anti-LC3A/B antibody reveals the presence of lysosomes (red puncta), autophagosomes (green puncta), and autolysosomes (yellow puncta) in cells treated with vehicle (DMSO), bemcentinib (0.8  $\mu\text{M}$ ), chloroquine (50  $\mu\text{M}$ ), or bemcentinib (0.8  $\mu\text{M}$ ) in combination with chloroquine (50  $\mu\text{M}$ ) for 24 hours. Scale bar: 100  $\mu\text{m}$ .
